# Supplementary material for: Early inflammatory markers as prognostic indicators following allogeneic stem cell transplantation
Source: PubMed Central journal article supplement (PMC10791949; doi:10.3389/fimmu.2023.1332777), 2024-01-03
Supplement: DataSheet_1.pdf [file DataSheet_1.pdf]

## Supplementary Materials

**Supplementary Figure S1. Overview of Day 14 data in reduced dimensional space. UMAP of D14 sample NPX data overlaid with Diagnosis and clinical outcomes Survival, AGvHD, CGvHD and Relapse.**

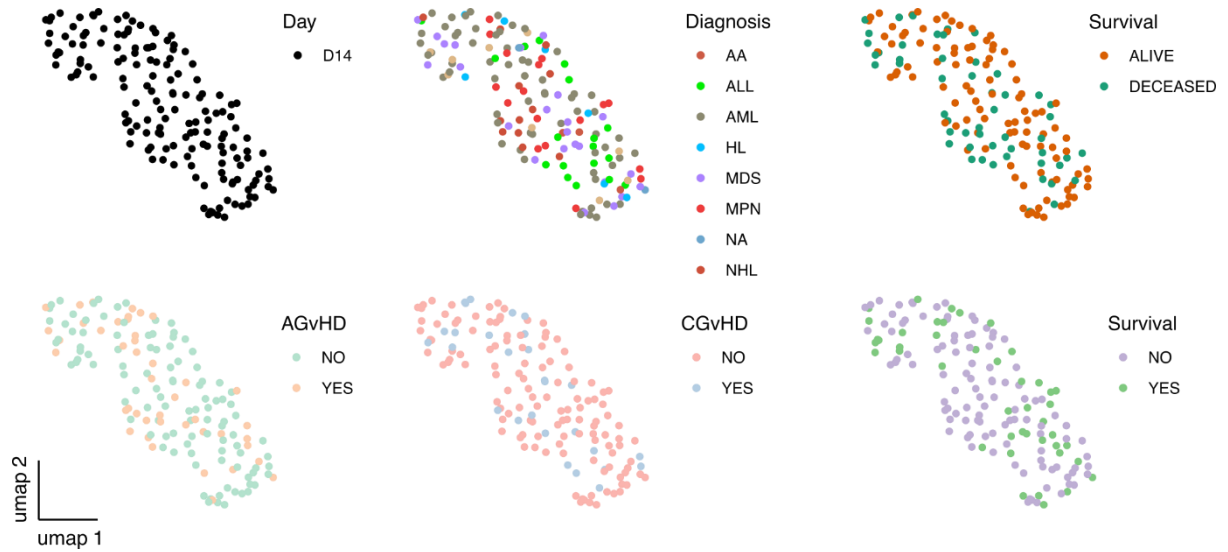

**Supplementary Figure S2. Overview of 92 proteins serum expression at day 14 post SCT in reduced dimensional space. UMAP of 154 D14 sample NPX data overlaid with serum protein NPX.**

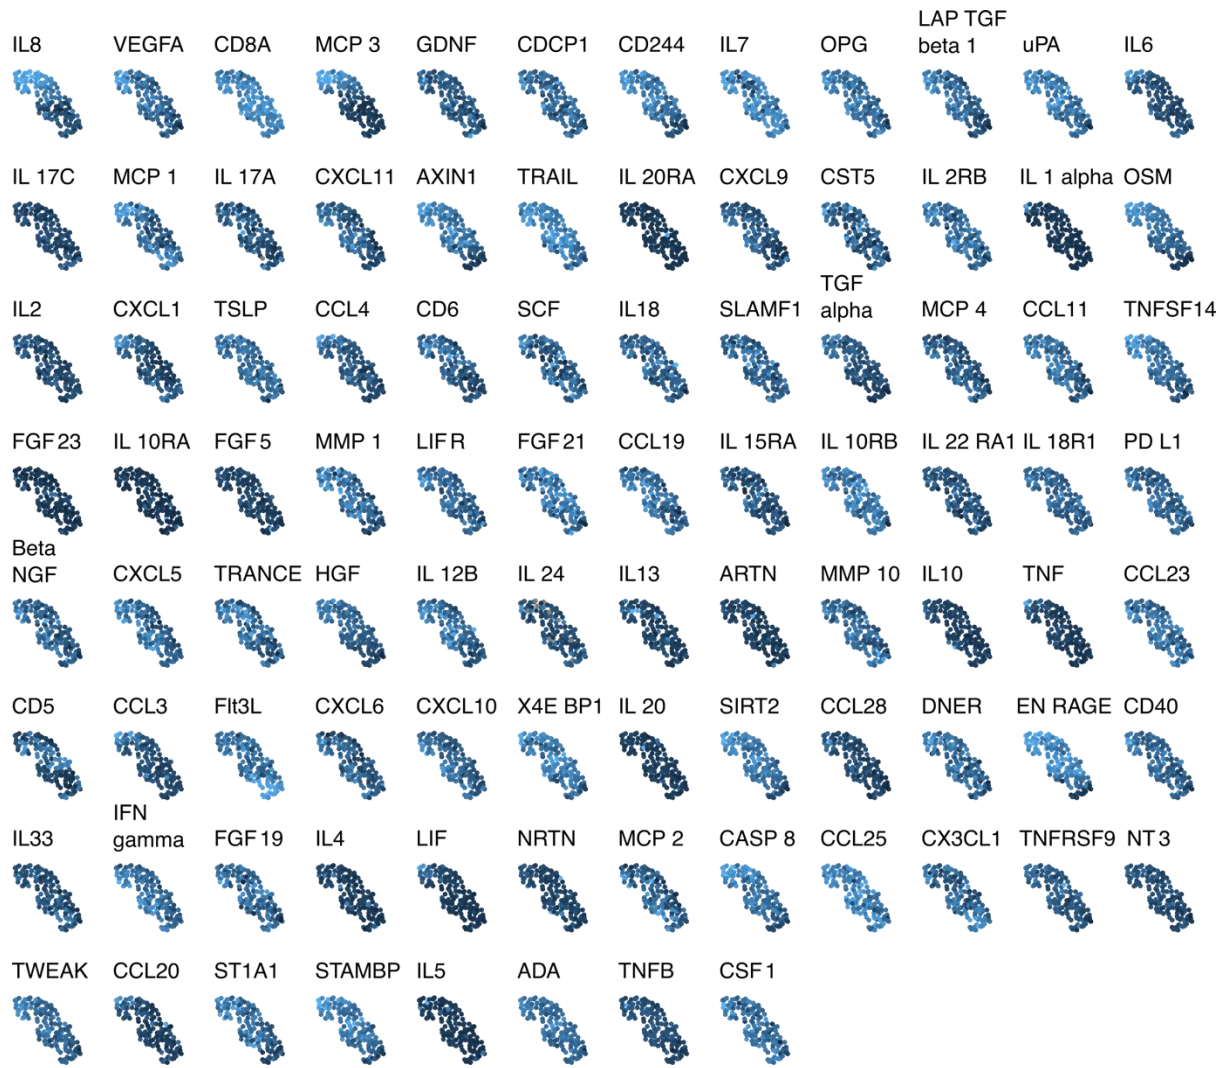

**Supplementary Figure S3. Correlation of relatively quantified Olink Normalised protein expression (NPX) data with absolute quantification of protein expression by ELISA in pg/ml for selected proteins. (A) PD-L1 (B) LIFR (C) FLt3L (D) CCL23 (E) IL-6 (F) CDCP1**

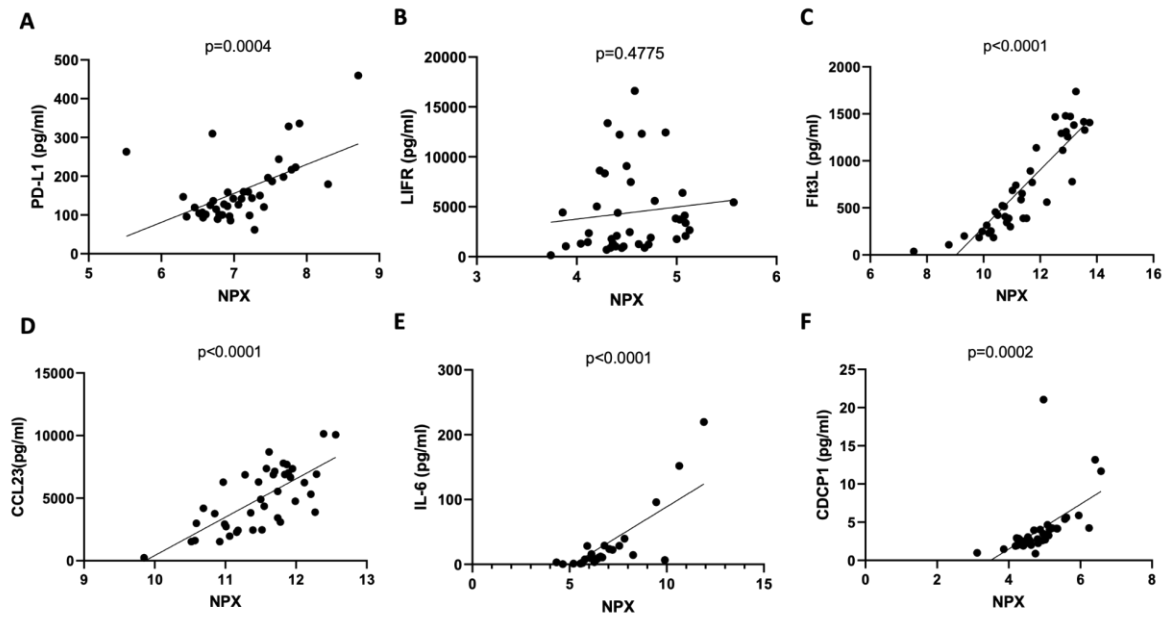

**Supplementary Table 1 – Univariate regression estimates for all end-points  
(attached in excel)**

**Supplementary Table 2 – Multivariate regression estimates for GRFS**

| Variable               | GvHD-free, relapse-free survival |               |        |         |
|------------------------|----------------------------------|---------------|--------|---------|
|                        | Adj.HR                           | Adj.CI        | P val. | PH test |
| Age at transplant / 10 | 1.09                             | (0.91 - 1.3)  | 0.34   | 0.519   |
| HCT-CI 0               |                                  |               |        | 0.962   |
| HCT-CI 1               | 1.27                             | (0.64 - 2.55) | 0.50   | 0.962   |
| HCT-CI 2               | 1.07                             | (0.6 - 1.91)  | 0.81   | 0.962   |
| HCT-CI 3+              | 2.05                             | (1.16 - 3.6)  | 0.02   | 0.962   |
|                        |                                  |               |        |         |
| CCL23                  | 1.3                              | (1.06 - 1.59) | 0.01   | 0.632   |

**Supplementary Table 3 – Multivariate regression estimates for OS**

| Variable               | Overall survival |               |        |         |
|------------------------|------------------|---------------|--------|---------|
|                        | Adj.HR           | Adj.CI        | P val. | PH test |
| Age at transplant / 10 | 1.07             | (0.81 - 1.4)  | 0.65   | 0.81    |
| D. sex Matched         |                  |               |        | 0.257   |
| D. sex Mismatched      | 0.53             | (0.28 - 0.99) | 0.06   | 0.257   |
| HCT-CI 0               |                  |               |        | 0.729   |
| HCT-CI 1               | 1.39             | (0.46 - 4.17) | 0.56   | 0.729   |
| HCT-CI 2               | 1.61             | (0.7 - 3.69)  | 0.27   | 0.729   |
| HCT-CI 3+              | 1.71             | (0.69 - 4.25) | 0.26   | 0.729   |
| RIC No                 |                  |               |        | 0.45    |
| RIC Yes                | 0.44             | (0.23 - 0.83) | 0.02   | 0.45    |
|                        |                  |               |        |         |
| PD-L1                  | 1.41             | (1.01 - 1.97) | 0.05   | 0.623   |
| CDCP1                  | 1.28             | (0.94 - 1.75) | 0.13   | 0.614   |

**Supplementary Table 4 – Multivariate regression estimates for RM and NRM**

| Variable               | Relapse-related mortality |                |        |         | Non-relapse mortality |                |        |         |
|------------------------|---------------------------|----------------|--------|---------|-----------------------|----------------|--------|---------|
|                        | Adj. HR (SD)              | Adj.CI         | P val. | PH test | Adj. HR (SD)          | Adj.CI         | P val. | PH test |
| Age at transplant / 10 | 1.19                      | (0.69 - 2.06)  | 0.54   | 0.10    | 1.11                  | (0.69 - 1.8)   | 0.66   | 0.40    |
| CD34+ dose             | 1.02                      | (0.82 - 1.26)  | 0.88   | 0.26    | 1.24                  | (1.02 - 1.49)  | 0.03   | 0.30    |
| Diagnosis Lymphoid     |                           |                |        |         |                       |                |        |         |
| Diagnosis Myeloid      | 8.35                      | (1.87 - 37.32) | 0.01   | 0.32    | 0.27                  | (0.1 - 0.73)   | 0.01   | 0.86    |
| HCT-CI 0               |                           |                |        |         |                       |                |        |         |
| HCT-CI 1               | 1.24                      | (0.15 - 10.16) | 0.85   | 0.39    | 0.83                  | (0.11 - 6.24)  | 0.86   | 0.50    |
| HCT-CI 2               | 2.22                      | (0.37 - 13.42) | 0.39   | 0.33    | 1.22                  | (0.31 - 4.87)  | 0.77   | 0.34    |
| HCT-CI 3+              | 0.32                      | (0.03 - 3.96)  | 0.39   | 0.46    | 4.9                   | (1.17 - 20.59) | 0.04   | 0.49    |
| P. sex Female          |                           |                |        |         |                       |                |        |         |
| P. sex Male            | 1.7                       | (0.4 - 7.14)   | 0.47   | 0.30    | 0.94                  | (0.35 - 2.49)  | 0.90   | 0.49    |
| TBI No                 |                           |                |        |         |                       |                |        |         |
| TBI Yes                | 3.98                      | (0.51 - 30.76) | 0.19   | 0.28    | 1.35                  | (0.39 - 4.7)   | 0.63   | 0.70    |
| CCL23                  | 1.94                      | (0.78 - 4.87)  | 0.16   | 0.28    | 1.11                  | (0.62 - 1.97)  | 0.73   | 0.92    |
| CDCP1                  | 2.41                      | (1.27 - 4.56)  | 0.01   | 0.50    | 1.26                  | (0.82 - 1.94)  | 0.29   | 0.60    |
| CSF-1                  | 0.93                      | (0.34 - 2.54)  | 0.88   | 0.12    | 1.57                  | (0.95 - 2.6)   | 0.08   | 0.09    |
| CXCL10                 | 0.57                      | (0.32 - 1.02)  | 0.06   | 0.08    | 1.29                  | (0.76 - 2.2)   | 0.34   | 0.97    |
| IL6                    | 0.47                      | (0.22 - 1)     | 0.05   | 0.07    | 1.5                   | (1 - 2.23)     | 0.05   | 0.46    |
| LIF-R                  | 1.48                      | (0.66 - 3.3)   | 0.35   | 0.31    | 0.47                  | (0.28 - 0.77)  | 0.00   | 0.19    |
| PD-L1                  | 0.6                       | (0.24 - 1.5)   | 0.28   | 0.35    | 1.35                  | (0.71 - 2.55)  | 0.36   | 0.06    |
| TNFRSF9                | 2.39                      | (0.81 - 7.03)  | 0.11   | 0.12    | 0.75                  | (0.4 - 1.41)   | 0.37   | 0.28    |

**Supplementary Table 5 – Multivariate regression estimates for AGvHD and death (any other cause)**

| Variable               | AGvHD        |               |        |         | Death (without AGvHD) |               |        |         |
|------------------------|--------------|---------------|--------|---------|-----------------------|---------------|--------|---------|
|                        | Adj. HR (SD) | Adj.CI        | P val. | PH test | Adj. HR (SD)          | Adj.CI        | P val. | PH test |
| Age at transplant / 10 | 1.46         | (1.03 - 2.08) | 0.04   | 0.64    | 0.93                  | (0.68 - 1.29) | 0.68   | 0.65    |
| CD34+ dose             | 1.06         | (0.88 - 1.27) | 0.55   | 0.60    | 1                     | (0.88 - 1.14) | 0.94   | 0.73    |
| Diagnosis Lymphoid     |              |               |        |         |                       |               |        |         |
| Diagnosis Myeloid      | 0.9          | (0.37 - 2.21) | 0.81   | 0.19    | 0.92                  | (0.39 - 2.2)  | 0.86   | 0.39    |
| HCT-CI 0               |              |               |        |         |                       |               |        |         |
| HCT-CI 1               | 1.22         | (0.37 - 3.99) | 0.74   | 0.19    | 0.75                  | (0.16 - 3.55) | 0.72   | 0.35    |
| HCT-CI 2               | 0.83         | (0.25 - 2.71) | 0.75   | 0.20    | 1.08                  | (0.37 - 3.18) | 0.88   | 0.22    |
| HCT-CI 3+              | 2.6          | (0.97 - 6.95) | 0.06   | 0.38    | 0.91                  | (0.24 - 3.37) | 0.89   | 0.10    |
| P. sex Female          |              |               |        |         |                       |               |        |         |
| P. sex Male            | 1.08         | (0.53 - 2.17) | 0.84   | 0.91    | 1.01                  | (0.41 - 2.5)  | 0.98   | 0.59    |
| TBI No                 |              |               |        |         |                       |               |        |         |
| TBI Yes                | 1.48         | (0.66 - 3.34) | 0.34   | 0.65    | 1.89                  | (0.54 - 6.6)  | 0.32   | 0.62    |
| CCL23                  | 1.66         | (1.12 - 2.46) | 0.01   | 0.74    | 0.65                  | (0.35 - 1.2)  | 0.17   | 0.03    |
| CDCP1                  | 0.93         | (0.64 - 1.35) | 0.70   | 0.96    | 1.37                  | (0.98 - 1.92) | 0.07   | 0.23    |
| CSF-1                  | 0.95         | (0.6 - 1.51)  | 0.83   | 0.42    | 1.13                  | (0.64 - 1.97) | 0.68   | 0.77    |
| CXCL10                 | 0.89         | (0.59 - 1.35) | 0.60   | 0.45    | 1.04                  | (0.65 - 1.64) | 0.88   | 0.65    |
| IL6                    | 1.13         | (0.77 - 1.65) | 0.54   | 0.07    | 0.89                  | (0.62 - 1.29) | 0.55   | 0.73    |
| PD-L1                  | 0.87         | (0.5 - 1.52)  | 0.62   | 0.39    | 1.19                  | (0.72 - 1.96) | 0.51   | 0.50    |
| TNFRSF9                | 0.99         | (0.69 - 1.42) | 0.95   | 0.43    | 1.36                  | (0.91 - 2.04) | 0.13   | 0.20    |

**Supplementary Table 6 – Multivariate regression estimates for CGvHD and death (any other cause)**

| Variable               | CGvHD        |               |        |         | Death (without CGvHD) |               |        |         |
|------------------------|--------------|---------------|--------|---------|-----------------------|---------------|--------|---------|
|                        | Adj. HR (SD) | Adj.CI        | P val. | PH test | Adj. HR (SD)          | Adj.CI        | P val. | PH test |
| Age at transplant / 10 | 1.03         | (0.76 - 1.41) | 0.83   | 0.38    | 1.02                  | (0.71 - 1.48) | 0.91   | 0.71    |
| CD34+ dose             | 1.07         | (0.87 - 1.3)  | 0.53   | 0.91    | 1.11                  | (0.98 - 1.26) | 0.10   | 0.20    |
| Diagnosis Lymphoid     |              |               |        |         |                       |               |        |         |
| Diagnosis Myeloid      | 0.91         | (0.35 - 2.33) | 0.84   | 0.26    | 1                     | (0.42 - 2.4)  | 1.00   | 0.43    |
| HCT-CI 0               |              |               |        |         |                       |               |        |         |
| HCT-CI 1               | 1.01         | (0.2 - 5.02)  | 0.99   | 0.50    | 1.03                  | (0.31 - 3.41) | 0.96   | 0.70    |
| HCT-CI 2               | 0.94         | (0.3 - 2.97)  | 0.92   | 0.32    | 1.05                  | (0.3 - 3.6)   | 0.94   | 0.23    |
| HCT-CI 3+              | 0.67         | (0.17 - 2.64) | 0.57   | 0.44    | 2.35                  | (0.89 - 6.19) | 0.09   | 0.38    |
| TBI No                 |              |               |        |         |                       |               |        |         |
| TBI Yes                | 1.73         | (0.5 - 5.98)  | 0.38   | 0.77    | 1.19                  | (0.42 - 3.34) | 0.74   | 0.83    |
| CCL23                  | 1.14         | (0.79 - 1.64) | 0.50   | 0.58    | 1.06                  | (0.65 - 1.72) | 0.83   | 0.60    |
| CDCP1                  | 0.9          | (0.59 - 1.38) | 0.64   | 0.12    | 1.26                  | (0.88 - 1.81) | 0.21   | 0.85    |
| CSF.1                  | 0.7          | (0.39 - 1.24) | 0.22   | 0.18    | 1.37                  | (0.83 - 2.26) | 0.22   | 0.39    |
| CXCL10                 | 0.96         | (0.64 - 1.42) | 0.83   | 0.12    | 0.9                   | (0.6 - 1.35)  | 0.63   | 0.49    |
| IL6                    | 1.14         | (0.75 - 1.71) | 0.54   | 0.56    | 1.02                  | (0.74 - 1.4)  | 0.90   | 0.71    |
| PD-L1                  | 1.5          | (0.8 - 2.82)  | 0.20   | 0.07    | 1.08                  | (0.67 - 1.74) | 0.74   | 0.25    |
| TNFRSF9                | 0.85         | (0.53 - 1.36) | 0.50   | 0.11    | 1.09                  | (0.52 - 2.25) | 0.82   | 0.40    |

**Supplementary Table 7 – Multivariate regression estimates for relapse and NRM**

| Variable               | Relapse      |               |        |         | Non-relapse mortality |                |        |         |
|------------------------|--------------|---------------|--------|---------|-----------------------|----------------|--------|---------|
|                        | Adj. HR (SD) | Adj.CI        | P val. | PH test | Adj. HR (SD)          | Adj.CI         | P val. | PH test |
| Age at transplant / 10 | 1.04         | (0.77 - 1.4)  | 0.80   | 0.55    | 1.13                  | (0.7 - 1.81)   | 0.62   | 0.41    |
| CD34+ dose             | 1.07         | (0.93 - 1.23) | 0.35   | 0.34    | 1.21                  | (1 - 1.46)     | 0.05   | 0.31    |
| Diagnosis Lymphoid     |              |               |        |         |                       |                |        |         |
| Diagnosis Myeloid      | 2.3          | (1 - 5.26)    | 0.05   | 0.05    | 0.24                  | (0.08 - 0.7)   | 0.01   | 0.78    |
| HCT-CI 0               |              |               |        |         |                       |                |        |         |
| HCT-CI 1               | 1.43         | (0.36 - 5.57) | 0.61   | 0.41    | 1                     | (0.12 - 8.31)  | 1.00   | 0.59    |
| HCT-CI 2               | 1.63         | (0.7 - 3.79)  | 0.26   | 0.53    | 1.24                  | (0.3 - 5.12)   | 0.77   | 0.34    |
| HCT-CI 3+              | 0.55         | (0.18 - 1.67) | 0.29   | 0.35    | 4.62                  | (1.01 - 21.26) | 0.06   | 0.18    |
| P. sex Female          |              |               |        |         |                       |                |        |         |
| P. sex Male            | 0.78         | (0.38 - 1.61) | 0.50   | 0.52    | 0.95                  | (0.35 - 2.6)   | 0.93   | 0.59    |
| TBI No                 |              |               |        |         |                       |                |        |         |
| TBI Yes                | 0.67         | (0.21 - 2.16) | 0.50   | 0.11    | 1.38                  | (0.42 - 4.55)  | 0.60   | 0.48    |
| CCL23                  | 1.42         | (0.87 - 2.31) | 0.16   | 0.76    | 1.16                  | (0.65 - 2.08)  | 0.61   | 0.93    |
| CDCP1                  | 1.29         | (0.91 - 1.84) | 0.16   | 0.88    | 1.26                  | (0.82 - 1.95)  | 0.29   | 0.56    |
| CXCL10                 | 0.66         | (0.48 - 0.9)  | 0.01   | 0.47    | 1.49                  | (0.89 - 2.5)   | 0.13   | 0.97    |
| IL6                    | 0.72         | (0.5 - 1.04)  | 0.08   | 0.37    | 1.54                  | (1.04 - 2.28)  | 0.03   | 0.47    |
| LIF-R                  | 1.04         | (0.73 - 1.48) | 0.82   | 0.83    | 0.48                  | (0.28 - 0.82)  | 0.01   | 0.16    |
| PD-L1                  | 0.9          | (0.49 - 1.65) | 0.72   | 0.67    | 1.44                  | (0.79 - 2.63)  | 0.23   | 0.07    |
| TNFRSF9                | 1.15         | (0.6 - 2.23)  | 0.67   | 0.10    | 0.86                  | (0.49 - 1.51)  | 0.61   | 0.37    |
